# Supplementary material for: Unravelling the visible light-assisted catalytic prowess of an n–n type In2S3/CeO2 Z-scheme heterojunction towards organic and inorganic water pollution mitigation
Source: Royal Society of Chemistry journal article supplement (doi:10.1039/d0nj04844e), 2021-01-01
Supplement: d0nj04844e1.pdf [file d0nj04844e1.pdf]

**Manuscript ID NJ-ART-10-2020-004844**

**Supplementary Information**

**Unravelling the visible light-assisted catalytic prowess of n-n type  $\text{In}_2\text{S}_3/\text{CeO}_2$  Z-scheme heterojunction towards organic and inorganic water pollution mitigation.**

**M. Murugalakshmi<sup>a,c</sup>, B. Filip Jones<sup>a</sup>, G. Mamba<sup>b</sup>, D. Maruthamani<sup>d</sup>, V. Muthuraj<sup>a,\*</sup>.**

<sup>a</sup> Department of Chemistry, V.H.N. Senthikumara Nadar College (Autonomous), Virudhunagar 626 001, Tamil Nadu, India

<sup>b</sup> Nanotechnology and Water Sustainability Research Unit, College of Science, Engineering and Technology, University of South Africa, Florida, 1709 Johannesburg, South Africa

<sup>c</sup> Department of Chemistry, Sri Kaliswari College (Autonomous), Sivakasi 626 123, Tamil Nadu, India.

<sup>d</sup> Department of Chemistry, PSG College of Technology, Coimbatore, 641 004, Tamil Nadu, India.

**\*Corresponding Author**

E-mail: muthuraj75@gmail.com, (Dr V.Muthuraj)

Tel:

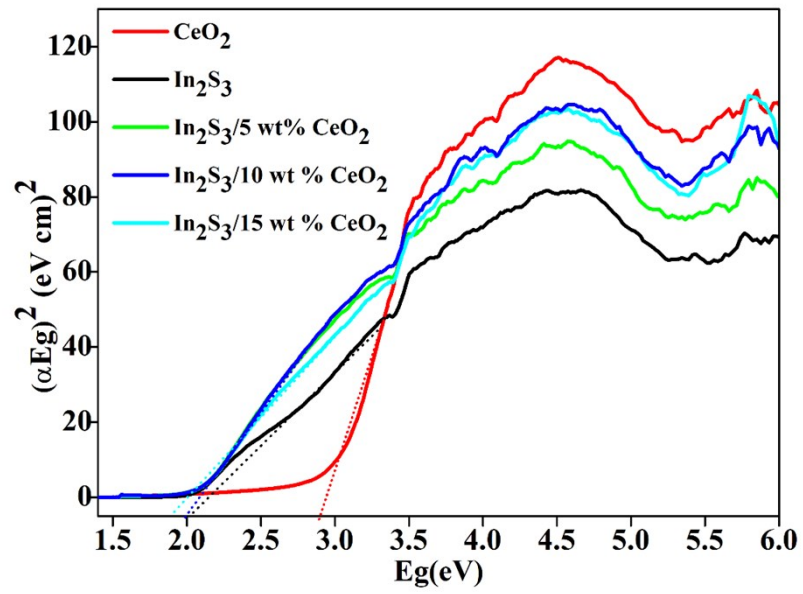

+919940965228.

**Fig. S1.** Tauc plots spectrum of  $\text{In}_2\text{S}_3$ ,  $\text{CeO}_2$ ,  $\text{In}_2\text{S}_3/\text{wt\%CeO}_2$  nanocomposites.

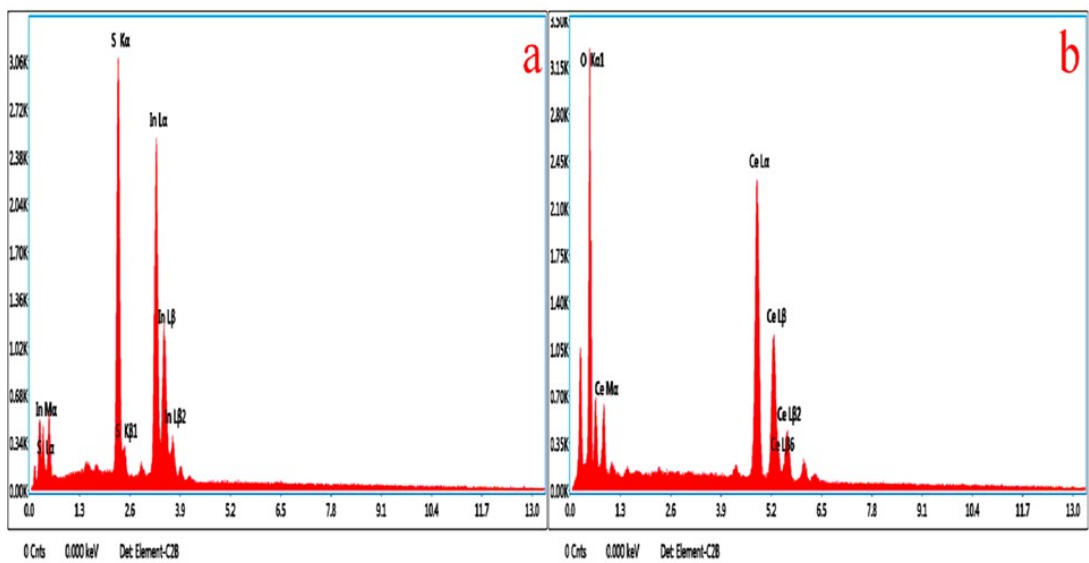

Fig S2. a) EDAX of pure  $\text{In}_2\text{S}_3$  b) EDAX of pure  $\text{CeO}_2$

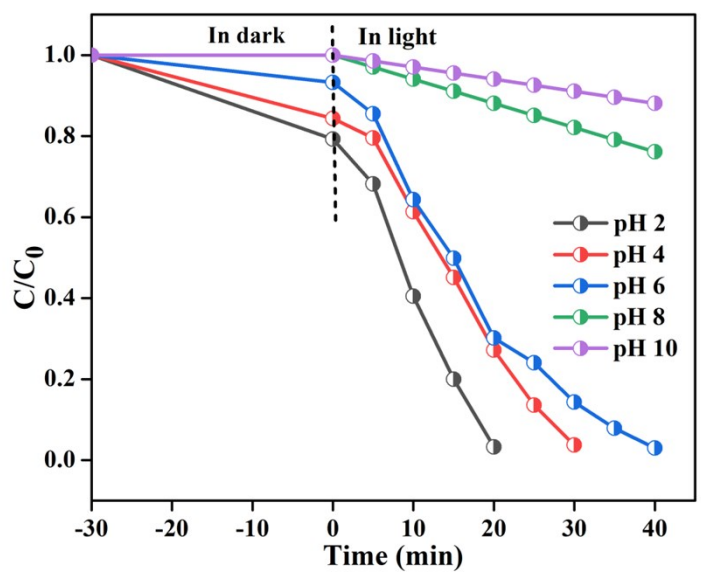

**Fig S3: Effect of pH in the photoreduction of Cr(VI).**

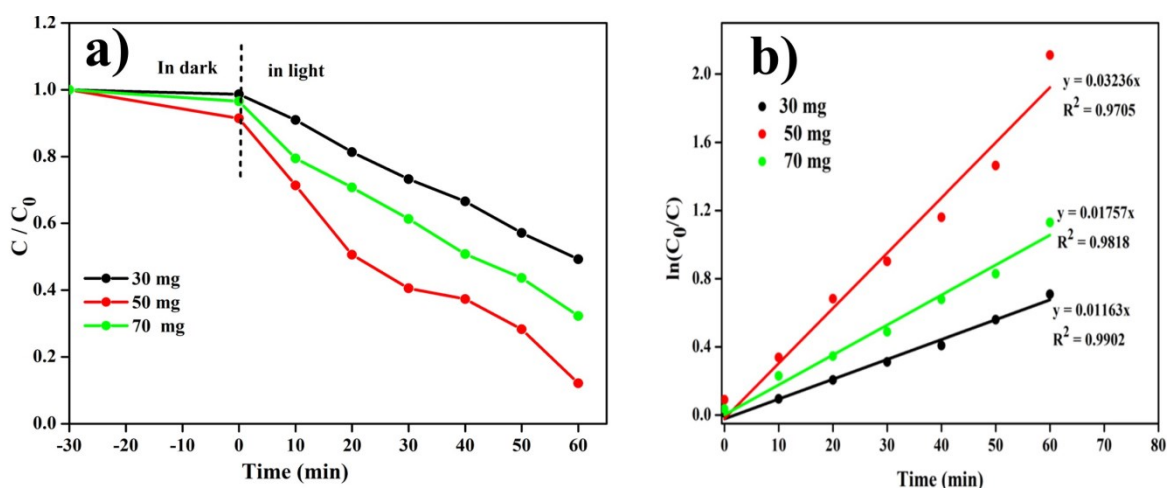

**Fig S4. a) Effect of dose variation of In<sub>2</sub>S<sub>3</sub>/10 wt % CeO<sub>2</sub> b) Kinetics of effect of dose variation of In<sub>2</sub>S<sub>3</sub>/10 wt % CeO<sub>2</sub>.**

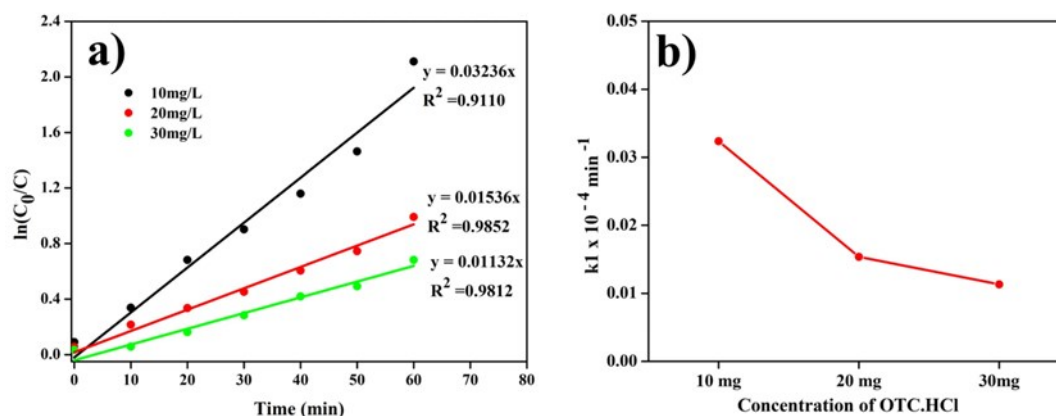

**Fig S5. a) Kinetic curve of effect of initial concentration of OTC with the photocatalyst In<sub>2</sub>S<sub>3</sub>/10wt% CeO<sub>2</sub> b) Rate of degradation for variation of initial concentration of OTC.**

**Table S1.** Kinetic constant and efficiency values for the photoreduction of Cr(VI) over the prepared photocatalysts.

| Photocatalyst                                        | Rate constant (k)<br>(min <sup>-1</sup> ) | R <sup>2</sup> | Degradation<br>efficiency (%) |
|------------------------------------------------------|-------------------------------------------|----------------|-------------------------------|
| In <sub>2</sub> S <sub>3</sub>                       | 0.03078                                   | 0.9506         | 70.7                          |
| CeO <sub>2</sub>                                     | 0.01619                                   | 0.9941         | 46.9                          |
| In <sub>2</sub> S <sub>3</sub> /5wt%CeO <sub>2</sub> | 0.03678                                   | 0.9693         | 76.7                          |

|                                                         |         |        |      |
|---------------------------------------------------------|---------|--------|------|
| <b>In<sub>2</sub>S<sub>3</sub>/10wt%CeO<sub>2</sub></b> | 0.08307 | 0.9369 | 97.5 |
| <b>In<sub>2</sub>S<sub>3</sub>/15wt%CeO<sub>2</sub></b> | 0.04993 | 0.9745 | 85.4 |

**Table S2.** Kinetic constants and degradation efficiency values for the photodegradation of OTC.

| <b>Photocatalyst</b> | <b>Rate constant (k) (min<sup>-1</sup>)</b> | <b>R<sup>2</sup></b> | <b>Degradation efficiency (%)</b> |
|----------------------|---------------------------------------------|----------------------|-----------------------------------|
|----------------------|---------------------------------------------|----------------------|-----------------------------------|

|                                                            |         |        |      |
|------------------------------------------------------------|---------|--------|------|
| <b>In<sub>2</sub>S<sub>3</sub></b>                         | 0.01480 | 0.9787 | 61.0 |
| <b>CeO<sub>2</sub></b>                                     | 0.00835 | 0.9964 | 39.0 |
| <b>In<sub>2</sub>S<sub>3</sub>/5 wt % CeO<sub>2</sub></b>  | 0.01954 | 0.9955 | 70.4 |
| <b>In<sub>2</sub>S<sub>3</sub>/10 wt % CeO<sub>2</sub></b> | 0.03236 | 0.9705 | 87.9 |
| <b>In<sub>2</sub>S<sub>3</sub>/15 wt % CeO<sub>2</sub></b> | 0.02372 | 0.9818 | 78.3 |

**Table S3.** Comparison of Photocatalytic efficiency of Photocatalyst in this work with other relevant work:

| <b>Photocatalyst</b>                                 | <b>Catalyst (g/L)</b> | <b>Pollutant</b> | <b>Light Source</b>              | <b>Time (min)</b> | <b>% degradation</b> | <b>Rate Constant (min<sup>-1</sup>)</b> | <b>Ref</b> |
|------------------------------------------------------|-----------------------|------------------|----------------------------------|-------------------|----------------------|-----------------------------------------|------------|
| In <sub>2</sub> S <sub>3</sub> / CeO <sub>2</sub>    | 0.5                   | Cr (VI) – 40mg/L | 300W Tungsten Lamp               | 40                | 97.45%               | 0.08307                                 | This work  |
| In <sub>2</sub> S <sub>3</sub> / CeO <sub>2</sub>    | 0.5                   | OTC.HCl –10mg /L | 300W Tungsten Lamp               | 60                | 87.89%               | 0.03236                                 | This work  |
| Ag/AgBr/BiVO <sub>4</sub>                            | 0.5                   | Cr (VI) – 10mg/L | 300W Xe lamp                     | 60                | 91.72%               | 0.0405                                  | 47         |
| Ag/AgCl/BiVO <sub>4</sub>                            | 1                     | OTC.HCl –20mg /L | 1000W Xe lamp.                   | 120               | 91                   | 0.0294                                  | 47         |
| ZnO/AgVO <sub>3</sub>                                | 0.5                   | Cr (VI) – 20mg/L | 300 W Xe lamp                    | 90                | 92.77                | 0.04624                                 | 42         |
| CdS-SnO <sub>2</sub>                                 | 0.4                   | Cr (VI) – 10mg/L | 300W Xe lamp                     | 20                | 95%                  | 0.0581                                  | 43         |
| rh-In <sub>2</sub> O <sub>3</sub>                    | 0.5                   | OTC.HCl –10mg /L | 300 W high-pressure mercury lamp | 120               | 89.5%                | 0.0148                                  | 44         |
| Co <sub>3</sub> O <sub>4</sub> /TiO <sub>2</sub> /GO | 0.5                   | OTC.HCl –10mg /L | 300W Xe lamp                     | 90                | 91%                  | 0.0272                                  | 45         |
